# Supplementary material
Source: Springer Nature journal article supplement (https://www.springermedizin.de/resource/supplementary/13756_2011_8_MOESM2_ESM.pdf/9682290)

incidence density ICU-acquired MRSA  
(cases per 1000 patient days)

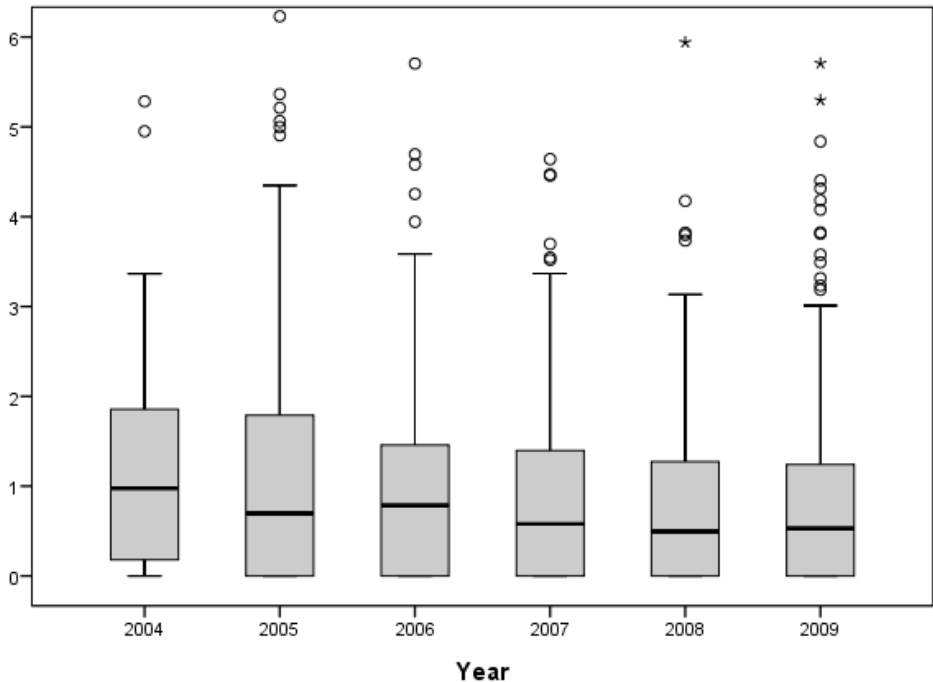

Supplement: MOESM2 [file 9682290]
